# Supplementary material
Source: publisher site journal article supplement (https://www.dovepress.com/article/260734)
Supplement: Supplementary file 1 [file get_supplementary_file.php]

**Table S1:** Biochemical markers examined by included studies, the biological systems they pertain to, and a summary of their relationship to PTSD and Sleep. Abbreviations: Delta power sleep (DPS), slow wave sleep (SWS), Number of Awakenings (NOA), PTSD checklist military version (PCL-M), Insomnia severity index (ISI), Non-significant (NS), Athens insomnia scale (AIS).

| <i>Biological System</i>                          | <i>Biochemical Marker</i>                                    | <i>PTSD</i>                                                                                                                                                               | <i>Sleep</i>                                                                                                                                                 |
|---------------------------------------------------|--------------------------------------------------------------|---------------------------------------------------------------------------------------------------------------------------------------------------------------------------|--------------------------------------------------------------------------------------------------------------------------------------------------------------|
| <i>Growth and Metabolism</i>                      | BDNF                                                         | <ul style="list-style-type: none"> <li>No baseline difference</li> <li>PCL-M score reduction not related to BDNF</li> </ul>                                               | <ul style="list-style-type: none"> <li>NS Increase in BDNF with improved sleep</li> </ul>                                                                    |
|                                                   | IGF-1                                                        | <ul style="list-style-type: none"> <li>No baseline difference</li> <li>PCL-M score reduction not related IGF-1 increases</li> </ul>                                       | <ul style="list-style-type: none"> <li>IGF-1 significantly increased with improved sleep</li> </ul>                                                          |
|                                                   | mRNA expression PDK4                                         | <ul style="list-style-type: none"> <li>Relationship not explored</li> </ul>                                                                                               | <ul style="list-style-type: none"> <li>Sig. increased expression with improved sleep</li> </ul>                                                              |
| <i>Inflammatory</i>                               | mRNA expression; IL-1b, IL-6, IL-8, IL-13, CCL3, CCL4, CCL5  | <ul style="list-style-type: none"> <li>Relationship not explored</li> </ul>                                                                                               | <ul style="list-style-type: none"> <li>Improved sleep associated with significant reduction in inflammatory mRNA expression</li> </ul>                       |
|                                                   | CRP                                                          | <ul style="list-style-type: none"> <li>PCL-M score change and CRP relationship not explored</li> <li>Not related to PDS</li> <li>No difference PTSD vs Control</li> </ul> | <ul style="list-style-type: none"> <li>Sig. reduction in sleep improved</li> <li>No correlation with AIS</li> </ul>                                          |
|                                                   | IL-6                                                         | <ul style="list-style-type: none"> <li>PCL-M relationship not explored, no relationship with PDS</li> <li>Elevated in PTSD vs control</li> </ul>                          | <ul style="list-style-type: none"> <li>No effect with improved sleep</li> <li>No correlation with AIS</li> </ul>                                             |
|                                                   | IL-1 $\beta$                                                 | <ul style="list-style-type: none"> <li>Not related to PDS</li> <li>No difference PTSD vs Control</li> </ul>                                                               | <ul style="list-style-type: none"> <li>No correlation with AIS</li> </ul>                                                                                    |
|                                                   | TNF- $\alpha$                                                | <ul style="list-style-type: none"> <li>Not related to PDS</li> <li>No difference PTSD vs Control</li> </ul>                                                               | <ul style="list-style-type: none"> <li>No correlation with AIS</li> </ul>                                                                                    |
|                                                   | sIL-6R                                                       | <ul style="list-style-type: none"> <li>Not related to PDS</li> <li>No difference PTSD vs Control</li> </ul>                                                               | <ul style="list-style-type: none"> <li>No correlation with AIS</li> </ul>                                                                                    |
|                                                   | <i>Anti-inflammatory</i>                                     | mRNA expression TLR4, TLR8, TLR7, TLR1                                                                                                                                    | <ul style="list-style-type: none"> <li>relationship not explored</li> </ul>                                                                                  |
| IL-10                                             |                                                              | <ul style="list-style-type: none"> <li>PCL-M relationship not explored</li> </ul>                                                                                         | <ul style="list-style-type: none"> <li>ISI score and IL-10 relationship not examined</li> </ul>                                                              |
| <i>Stress Response</i>                            | mRNA cytochrome P450 CYP1B1, FKBP506 binding protein, FKBP15 | <ul style="list-style-type: none"> <li>Relationship not explored</li> </ul>                                                                                               | <ul style="list-style-type: none"> <li>Increased expression with improved sleep</li> </ul>                                                                   |
|                                                   | Cortisol                                                     | <ul style="list-style-type: none"> <li>Baseline not sig. different</li> <li>Reduction of delta sleep greater in PTSD</li> </ul>                                           | <ul style="list-style-type: none"> <li>Inhibited cortisol resulted in reduction of DPS</li> </ul>                                                            |
|                                                   | 11-deoxycortisol                                             | <ul style="list-style-type: none"> <li>Increased baseline</li> </ul>                                                                                                      | <ul style="list-style-type: none"> <li>No difference</li> </ul>                                                                                              |
|                                                   | ACTH                                                         | <ul style="list-style-type: none"> <li>No baseline difference vs. non-PTSD</li> <li>Greater inc. following cortisol inhibition in PTSD</li> </ul>                         | <ul style="list-style-type: none"> <li>Negative relationship with PDS in PTSD</li> <li>Inverse relationship with SWS</li> <li>AUCg related to NOA</li> </ul> |
|                                                   | Cortisol:ACTH ratio                                          | <ul style="list-style-type: none"> <li>Sig. decreased in PTSD</li> </ul>                                                                                                  | <ul style="list-style-type: none"> <li>Most sig. between 0700 and 0800 hrs</li> </ul>                                                                        |
| <i>Sympathetic/parasympathetic activity Sleep</i> | Angiotensin II: Angiotensin 1-7 ratio                        | <ul style="list-style-type: none"> <li>PCL-M relationship not explored</li> </ul>                                                                                         | <ul style="list-style-type: none"> <li>ISI relationship not explored</li> </ul>                                                                              |
|                                                   | Melatonin                                                    | <ul style="list-style-type: none"> <li>No sig. difference</li> </ul>                                                                                                      | <ul style="list-style-type: none"> <li>Similar times of onset</li> </ul>                                                                                     |

**Table S2:** Summary of physiological markers used by included studies to investigate autonomic activity in relation to PTSD and sleep. Abbreviations: Time in Bed (TIB), Total sleep time (TST), Normal Range (NR), Normalised high frequency (n-HF) , Low Frequency (LF) , Intervals between adjacent QRS complexes (SDNN).

| <i>Biological System</i>                      | <i>Physiological Markers</i> | <i>PTSD</i>                                                                                                                               | <i>Sleep</i>                                                                                                                                                       |
|-----------------------------------------------|------------------------------|-------------------------------------------------------------------------------------------------------------------------------------------|--------------------------------------------------------------------------------------------------------------------------------------------------------------------|
| <i>Sympathetic / Parasympathetic activity</i> | Blood Pressure               | <ul style="list-style-type: none"> <li>Not related to nocturnal dipping status but dippers reported more hyperarousal symptoms</li> </ul> | <ul style="list-style-type: none"> <li>Nocturnal dippers poorer sleep quality and greater latency</li> <li>Inverse relationship with sleep quality (NR)</li> </ul> |
|                                               | Heart Rate                   | <ul style="list-style-type: none"> <li>Relationship not explored</li> </ul>                                                               | <ul style="list-style-type: none"> <li>Increased prior and following nightmare awakening but no indication of gradual increase</li> </ul>                          |
|                                               | Heart Rate Variability       | <ul style="list-style-type: none"> <li>SDNN significant predictor of post-intervention PCL-C scores</li> </ul>                            | <ul style="list-style-type: none"> <li>No association with ISI</li> </ul>                                                                                          |
|                                               | nHF                          | <ul style="list-style-type: none"> <li>TiB nHF Sig lower in PTSD</li> </ul>                                                               | <ul style="list-style-type: none"> <li>Average TST sig. correlated with TiB nHF in resilient but not PTSD</li> </ul>                                               |
|                                               | LF                           | <ul style="list-style-type: none"> <li>Relationship with PCL-M not explored</li> </ul>                                                    | <ul style="list-style-type: none"> <li>Relationship with ISI not explored</li> </ul>                                                                               |
|                                               | LF/HF ratio                  |                                                                                                                                           | <ul style="list-style-type: none"> <li>Sig correlated with TST in resilient but not PTSD</li> </ul>                                                                |
|                                               | Baroreceptor sensitivity     | <ul style="list-style-type: none"> <li>Sig. lower in PTSD</li> </ul>                                                                      | <ul style="list-style-type: none"> <li>Increased sleep efficiency, improved BRS in PTSD</li> <li>Decreased sleep efficiency, worse BRS in PTSD</li> </ul>          |
|                                               | Respiratory Rate             | <ul style="list-style-type: none"> <li>Relationship not explored</li> </ul>                                                               | <ul style="list-style-type: none"> <li>Related to nightmare experience in both REM and NREM</li> </ul>                                                             |
|                                               | Skin Conductance             | <ul style="list-style-type: none"> <li>Decrease in reactivity associated with tandem decrease in CAPS assessed symptoms</li> </ul>        | <ul style="list-style-type: none"> <li>Decreased reactivity with decreased nightmare severity and improved sleep quality</li> </ul>                                |
|                                               | Respiratory Sinus Arrhythmia | <ul style="list-style-type: none"> <li>Not investigated</li> </ul>                                                                        | <ul style="list-style-type: none"> <li>Low sleep period RSA predictive of nightmare occurrence in PTSD</li> </ul>                                                  |
|                                               | Respiratory Event Index      | <ul style="list-style-type: none"> <li>Not Investigated</li> </ul>                                                                        | <ul style="list-style-type: none"> <li>Increased hypopneas/apneas predictive of nightmares</li> </ul>                                                              |
